# Supplementary material for: Very Large-Scale Neighborhood Search for the Quadratic Assignment Problem
Source: Atypon-hosted journal article supplement (doi:10.1287/ijoc.1060.0201), 2007-11-01
Supplement: ijoc.1060.0201-sm-ahuja-3.pdf [file ijoc.1060.0201-sm-ahuja-3.pdf]

# Online Supplement to “Very Large-Scale Neighborhood Search for the Quadratic Assignment Problem”

**Ravindra K. Ahuja**

Department of Industrial and Systems Engineering, University of Florida, Gainesville, Florida 32611, USA,  
ahuja@ufl.edu

**Krishna C. Jha**

Innovative Scheduling, Inc., GTEC, 2153 Hawthorne Road, Suite 128, Gainesville, FL 32641, USA,  
krishna@innovativescheduling.com

**James B. Orlin**

Sloan School of Management, Massachusetts Institute of Technology, Cambridge, MA 02139, USA,  
jorlin@mit.edu

**Dushyant Sharma**

Department of Industrial and Operations Engineering, University of Michigan, Ann Arbor, MI 48109, USA,  
dushyant@umich.edu

*INFORMS Journal on Computing*

## Computational Results for Instances Available at QAPLIB

Table A1: Computational results for symmetric instances

| Sl. No. | Problem | size | BKS        | 2OPT  |            | Implementation 3 |            | Implementation 4 |            |
|---------|---------|------|------------|-------|------------|------------------|------------|------------------|------------|
|         |         |      |            | % Gap | nRuns      | % Gap            | nRuns      | % Gap            | nRuns      |
| 1       | chr12a  | 12   | 9,552      | 0.000 | 31,712,292 | 0.000            | 16,254,895 | 0.000            | 21,082,900 |
| 2       | chr12b  | 12   | 9,742      | 0.000 | 26,611,999 | 0.000            | 16,530,536 | 0.000            | 19,472,739 |
| 3       | chr12c  | 12   | 11,156     | 0.000 | 33,270,169 | 0.000            | 17,102,975 | 0.000            | 15,658,161 |
| 4       | chr15a  | 15   | 9,896      | 0.000 | 17,304,596 | 0.000            | 8,174,248  | 0.000            | 8,012,561  |
| 5       | chr15b  | 15   | 7,990      | 0.000 | 16,059,718 | 0.000            | 8,831,730  | 0.000            | 9,560,663  |
| 6       | chr15c  | 15   | 9,504      | 0.000 | 17,210,809 | 0.000            | 8,391,655  | 0.000            | 7,830,310  |
| 7       | chr18a  | 18   | 11,098     | 0.000 | 9,810,866  | 0.000            | 4,747,508  | 0.000            | 4,451,389  |
| 8       | chr18b  | 18   | 1,534      | 0.000 | 11,526,130 | 0.000            | 4,467,984  | 0.000            | 10,692,947 |
| 9       | chr20a  | 20   | 2,192      | 0.000 | 7,692,126  | 0.000            | 3,085,174  | 0.000            | 6,096,344  |
| 10      | chr20b  | 20   | 2,298      | 0.000 | 8,305,308  | 0.000            | 3,449,659  | 0.000            | 4,603,225  |
| 11      | chr20c  | 20   | 14,142     | 0.000 | 6,303,790  | 0.000            | 3,143,547  | 0.000            | 3,289,192  |
| 12      | chr22a  | 22   | 6,156      | 0.000 | 5,323,772  | 0.000            | 1,990,571  | 0.000            | 3,488,032  |
| 13      | chr22b  | 22   | 6,194      | 0.000 | 5,717,439  | 0.000            | 1,817,172  | 0.000            | 3,034,681  |
| 14      | chr25a  | 25   | 3,796      | 0.000 | 3,647,456  | 0.000            | 1,494,790  | 0.000            | 1,673,174  |
| 15      | els19   | 19   | 17,212,548 | 0.000 | 6,405,445  | 0.000            | 1,919,968  | 0.000            | 3,713,257  |
| 16      | esc16a  | 16   | 68         | 0.000 | 21,556,242 | 0.000            | 7,438,615  | 0.000            | 20,696,247 |
| 17      | esc16b  | 16   | 292        | 0.000 | 28,775,197 | 0.000            | 6,862,990  | 0.000            | 27,097,971 |
| 18      | esc16c  | 16   | 160        | 0.000 | 19,392,543 | 0.000            | 7,046,453  | 0.000            | 17,301,811 |
| 19      | esc16d  | 16   | 16         | 0.000 | 21,257,317 | 0.000            | 7,157,048  | 0.000            | 21,189,753 |
| 20      | esc16e  | 16   | 28         | 0.000 | 22,823,090 | 0.000            | 9,494,114  | 0.000            | 25,490,122 |
| 21      | esc16f  | 16   | 0          | 0.000 | 73,490,811 | 0.000            | 40,619,875 | 0.000            | 90,780,473 |
| 22      | esc16g  | 16   | 26         | 0.000 | 20,308,315 | 0.000            | 9,759,591  | 0.000            | 21,808,809 |
| 23      | esc16h  | 16   | 996        | 0.000 | 27,408,083 | 0.000            | 8,942,438  | 0.000            | 23,660,264 |
| 24      | esc16i  | 16   | 14         | 0.000 | 23,927,309 | 0.000            | 11,940,972 | 0.000            | 24,148,595 |
| 25      | esc16j  | 16   | 8          | 0.000 | 30,274,087 | 0.000            | 7,036,368  | 0.000            | 27,076,828 |
| 26      | esc32a  | 32   | 130        | 0.000 | 2,312,502  | 0.000            | 699,279    | 0.000            | 2,213,783  |
| 27      | esc32b  | 32   | 168        | 0.000 | 2,013,151  | 0.000            | 912,849    | 0.000            | 2,167,570  |
| 28      | esc32c  | 32   | 642        | 0.000 | 2,730,836  | 0.000            | 871,535    | 0.000            | 2,558,298  |
| 29      | esc32d  | 32   | 200        | 0.000 | 2,422,403  | 0.000            | 932,744    | 0.000            | 2,548,921  |
| 30      | esc32e  | 32   | 2          | 0.000 | 6,015,653  | 0.000            | 1,149,553  | 0.000            | 6,882,009  |
| 31      | esc32f  | 32   | 2          | 0.000 | 6,298,438  | 0.000            | 1,148,633  | 0.000            | 6,092,161  |
| 32      | esc32g  | 32   | 6          | 0.000 | 5,396,627  | 0.000            | 1,215,503  | 0.000            | 6,323,472  |
| 33      | esc32h  | 32   | 438        | 0.000 | 2,848,142  | 0.000            | 705,638    | 0.000            | 2,735,300  |
| 34      | esc64a  | 64   | 116        | 0.000 | 1,187,380  | 0.000            | 235,582    | 0.000            | 1,006,388  |
| 35      | esc128  | 128  | 64         | 0.000 | 171,922    | 0.000            | 24,240     | 0.000            | 136,986    |
| 36      | had12   | 12   | 1,652      | 0.000 | 28,426,668 | 0.000            | 12,638,445 | 0.000            | 21,040,999 |
| 37      | had14   | 14   | 2,724      | 0.000 | 15,819,435 | 0.000            | 6,477,308  | 0.000            | 11,940,241 |
| 38      | had16   | 16   | 3,720      | 0.000 | 10,028,113 | 0.000            | 4,248,945  | 0.000            | 8,442,455  |
| 39      | had18   | 18   | 5,358      | 0.000 | 7,502,162  | 0.000            | 3,187,082  | 0.000            | 6,292,564  |

Table A1 (contd.): Computational results for symmetric instances

| Sl. No. | Problem | size | BKS      | 2OPT  |            | Implementation 3 |            | Implementation 4 |            |
|---------|---------|------|----------|-------|------------|------------------|------------|------------------|------------|
|         |         |      |          | % Gap | nRuns      | % Gap            | nRuns      | % Gap            | nRuns      |
| 40      | had20   | 20   | 6,922    | 0.000 | 5,472,203  | 0.000            | 2,016,782  | 0.000            | 4,517,495  |
| 41      | kra30a  | 30   | 88,900   | 0.000 | 2,072,430  | 0.000            | 698,648    | 0.000            | 2,094,614  |
| 42      | kra30b  | 30   | 91,420   | 0.000 | 2,443,596  | 0.000            | 738,067    | 0.000            | 2,032,130  |
| 43      | nug12   | 12   | 578      | 0.000 | 40,640,757 | 0.000            | 18,821,619 | 0.000            | 25,497,046 |
| 44      | nug14   | 14   | 1,014    | 0.000 | 25,162,507 | 0.000            | 9,071,632  | 0.000            | 15,643,569 |
| 45      | nug15   | 15   | 1,150    | 0.000 | 19,873,851 | 0.000            | 7,838,694  | 0.000            | 10,408,304 |
| 46      | nug16a  | 16   | 1,610    | 0.000 | 16,600,517 | 0.000            | 5,498,576  | 0.000            | 6,316,405  |
| 47      | nug16b  | 16   | 1,240    | 0.000 | 16,752,406 | 0.000            | 5,837,098  | 0.000            | 10,209,108 |
| 48      | nug17   | 17   | 1,732    | 0.000 | 13,628,664 | 0.000            | 4,652,916  | 0.000            | 9,134,037  |
| 49      | nug18   | 18   | 1,930    | 0.000 | 11,585,778 | 0.000            | 3,913,845  | 0.000            | 7,775,618  |
| 50      | nug20   | 20   | 2,570    | 0.000 | 8,494,265  | 0.000            | 2,847,679  | 0.000            | 5,522,913  |
| 51      | nug21   | 21   | 2,438    | 0.000 | 6,943,000  | 0.000            | 2,349,593  | 0.000            | 4,727,305  |
| 52      | nug22   | 22   | 3,596    | 0.000 | 5,723,281  | 0.000            | 2,052,996  | 0.000            | 3,916,112  |
| 53      | nug24   | 24   | 3,488    | 0.000 | 4,680,265  | 0.000            | 1,516,883  | 0.000            | 3,048,448  |
| 54      | nug25   | 25   | 3,744    | 0.000 | 4,104,777  | 0.000            | 1,364,179  | 0.000            | 2,716,776  |
| 55      | nug27   | 27   | 5,234    | 0.000 | 3,026,945  | 0.000            | 956,958    | 0.000            | 1,968,883  |
| 56      | nug28   | 28   | 5,166    | 0.000 | 2,788,867  | 0.000            | 794,864    | 0.000            | 1,556,981  |
| 57      | nug30   | 30   | 6,124    | 0.000 | 2,296,632  | 0.000            | 699,671    | 0.000            | 1,351,978  |
| 58      | rou12   | 12   | 235,528  | 0.000 | 39,205,459 | 0.000            | 18,443,364 | 0.000            | 18,279,741 |
| 59      | rou15   | 15   | 354,210  | 0.000 | 21,860,914 | 0.000            | 8,864,135  | 0.000            | 10,682,547 |
| 60      | rou20   | 20   | 725,522  | 0.000 | 9,294,137  | 0.000            | 2,773,330  | 0.000            | 5,055,579  |
| 61      | scr12   | 12   | 31,410   | 0.000 | 35,968,323 | 0.000            | 16,962,983 | 0.000            | 16,949,739 |
| 62      | scr15   | 15   | 51,140   | 0.000 | 18,326,360 | 0.000            | 8,698,038  | 0.000            | 4,605,403  |
| 63      | scr20   | 20   | 110,030  | 0.000 | 7,533,910  | 0.000            | 2,845,602  | 0.000            | 3,463,400  |
| 64      | ste36a  | 36   | 9,526    | 0.000 | 1,249,043  | 0.000            | 376,596    | 0.000            | 909,320    |
| 65      | ste36b  | 36   | 15,852   | 0.000 | 1,119,010  | 0.000            | 387,053    | 0.000            | 806,522    |
| 66      | ste36c  | 36   | 8,239.11 | 0.000 | 1,184,501  | 0.000            | 396,727    | 0.000            | 823,447    |
| 67      | tho30   | 30   | 149,936  | 0.000 | 2,213,935  | 0.000            | 717,238    | 0.000            | 1,365,423  |
| 68      | tho40   | 40   | 240,516  | 0.011 | 931,016    | 0.043            | 290,084    | 0.043            | 531,569    |
| 69      | wil50   | 50   | 48,816   | 0.070 | 857,619    | 0.033            | 251,949    | 0.090            | 591,795    |
| 70      | sko42   | 42   | 15,812   | 0.000 | 1,574,415  | 0.000            | 452,626    | 0.000            | 1,064,133  |
| 71      | sko49   | 49   | 23,386   | 0.188 | 952,764    | 0.103            | 271,136    | 0.214            | 657,801    |
| 72      | sko56   | 56   | 34,458   | 0.348 | 609,897    | 0.116            | 178,641    | 0.226            | 396,970    |
| 73      | sko64   | 64   | 48,498   | 0.334 | 397,207    | 0.177            | 110,623    | 0.433            | 237,221    |
| 74      | sko72   | 72   | 66,256   | 0.426 | 266,498    | 0.260            | 71,867     | 0.465            | 127,444    |
| 75      | sko81   | 81   | 90,998   | 0.433 | 184,553    | 0.308            | 46,835     | 0.516            | 113,365    |
| 76      | sko90   | 90   | 115,534  | 0.573 | 81,239     | 0.407            | 33,225     | 0.457            | 75,591     |
| 77      | sko100a | 100  | 152,002  | 0.524 | 90,571     | 0.289            | 22,536     | 0.462            | 55,820     |
| 78      | sko100b | 100  | 153,890  | 0.502 | 91,382     | 0.395            | 23,321     | 0.550            | 58,200     |
| 79      | sko100c | 100  | 147,862  | 0.498 | 89,829     | 0.331            | 22,093     | 0.594            | 61,904     |
| 80      | sko100d | 100  | 149,576  | 0.580 | 91,807     | 0.439            | 22,601     | 0.619            | 61,718     |

Table A1 (contd.): Computational results for symmetric instances

| Sl. No. | Problem | size | BKS        | 2OPT  |            | Implementation 3 |            | Implementation 4 |            |
|---------|---------|------|------------|-------|------------|------------------|------------|------------------|------------|
|         |         |      |            | % Gap | nRuns      | %Gap             | nRuns      | %Gap             | nRuns      |
| 81      | sko100e | 100  | 149,150    | 0.654 | 90,005     | 0.257            | 22,419     | 0.654            | 58,861     |
| 82      | sko100f | 100  | 149,036    | 0.621 | 92,669     | 0.326            | 22,159     | 0.652            | 65,504     |
| 83      | wil100  | 100  | 273,038    | 0.290 | 90,931     | 0.219            | 23,395     | 0.281            | 65,773     |
| 84      | tho150  | 150  | 8,133,484  | 0.812 | 23,562     | 0.681            | 4,987      | 0.841            | 12,686     |
| 85      | tai12a  | 12   | 224,416    | 0.000 | 38,533,000 | 0.000            | 14,132,061 | 0.000            | 14,379,768 |
| 86      | tai15a  | 15   | 388,214    | 0.000 | 22,166,179 | 0.000            | 8,215,009  | 0.000            | 6,890,965  |
| 87      | tai17a  | 17   | 491,812    | 0.000 | 15,153,936 | 0.000            | 5,260,533  | 0.000            | 4,845,802  |
| 88      | tai20a  | 20   | 703,482    | 0.000 | 9,566,555  | 0.000            | 2,874,825  | 0.000            | 2,971,179  |
| 89      | tai25a  | 25   | 1,167,256  | 0.000 | 5,158,952  | 0.000            | 1,479,942  | 0.000            | 1,595,760  |
| 90      | tai30a  | 30   | 1,818,146  | 0.016 | 2,910,332  | 0.000            | 651,383    | 0.177            | 985,694    |
| 91      | tai35a  | 35   | 2,422,002  | 0.384 | 1,860,388  | 0.000            | 388,448    | 0.384            | 609,266    |
| 92      | tai40a  | 40   | 3,139,370  | 1.160 | 1,244,839  | 0.687            | 241,590    | 1.099            | 445,870    |
| 93      | tai50a  | 50   | 4,938,796  | 1.813 | 1,288,258  | 1.151            | 211,159    | 1.665            | 435,550    |
| 94      | tai60a  | 60   | 7,205,962  | 2.016 | 736,571    | 1.400            | 109,142    | 1.746            | 313,690    |
| 95      | tai64c  | 64   | 1,855,928  | 0.000 | 1,568,762  | 0.000            | 320,094    | 0.000            | 1,123,419  |
| 96      | tai80a  | 80   | 13,515,450 | 2.166 | 309,320    | 1.459            | 34,429     | 1.957            | 100,888    |
| 97      | tai100a | 100  | 21,059,006 | 2.266 | 157,090    | 1.569            | 14,302     | 1.900            | 67,605     |
| 98      | tai256c | 256  | 44,759,294 | 0.185 | 19,821     | 0.188            | 3,170      | 0.187            | 15,798     |
| 99      | pal20   | 20   | 81,536     | 0.000 | 8,839,988  | 0.000            | 2,986,987  | 0.000            | 6,502,837  |
| 100     | pal30   | 30   | 271,092    | 0.354 | 2,793,615  | 0.404            | 875,691    | 0.378            | 1,946,438  |
| 101     | pal40   | 40   | 837,900    | 0.288 | 1,181,202  | 0.285            | 354,432    | 0.288            | 885,307    |
| 102     | pal50   | 50   | 1,840,356  | 0.322 | 1,205,231  | 0.314            | 337,582    | 0.318            | 811,864    |
| 103     | pal60   | 60   | 2,967,464  | 0.343 | 682,184    | 0.327            | 186,696    | 0.343            | 501,638    |
| 104     | pal70   | 70   | 5,815,290  | 0.273 | 362,577    | 0.263            | 112,403    | 0.253            | 383,459    |
| 105     | pal80   | 80   | 6,597,906  | 0.296 | 259,471    | 0.287            | 68,472     | 0.296            | 293,741    |
| 106     | pal100  | 100  | 15,008,994 | 0.257 | 103,297    | 0.250            | 28,724     | 0.256            | 144,416    |
| 107     | pal150  | 150  | 58,352,664 | 0.193 | 24,357     | 0.188            | 5,708      | 0.191            | 38,978     |
| 108     | pal200  | 200  | 75,405,684 | 0.178 | 10,410     | 0.174            | 1,769      | 0.177            | 15,439     |

Table A2: Computational results for asymmetric instances

| Sl. No. | Problem | size | BKS           | 2OPT  |           | Implementation 3 |           | Implementation 4 |         |
|---------|---------|------|---------------|-------|-----------|------------------|-----------|------------------|---------|
|         |         |      |               | % Gap | nRuns     | %Gap             | nRuns     | %Gap             | nRuns   |
| 1       | bur26a  | 26   | 5,426,670     | 0.000 | 114,672   | 0.000            | 85,634    | 0.000            | 114,606 |
| 2       | bur26b  | 26   | 3,817,852     | 0.000 | 122,308   | 0.000            | 87,293    | 0.000            | 122,247 |
| 3       | bur26c  | 26   | 5,426,795     | 0.000 | 112,625   | 0.000            | 82,912    | 0.000            | 112,556 |
| 4       | bur26d  | 26   | 3,821,225     | 0.000 | 119,809   | 0.000            | 87,760    | 0.000            | 119,743 |
| 5       | bur26e  | 26   | 5,386,879     | 0.000 | 110,953   | 0.000            | 83,787    | 0.000            | 110,890 |
| 6       | bur26f  | 26   | 3,782,044     | 0.000 | 119,957   | 0.000            | 87,391    | 0.000            | 119,891 |
| 7       | bur26g  | 26   | 10,117,172    | 0.000 | 109,920   | 0.000            | 83,347    | 0.000            | 109,829 |
| 8       | bur26h  | 26   | 7,098,658     | 0.000 | 116,744   | 0.000            | 93,540    | 0.000            | 116,677 |
| 9       | lipa20a | 20   | 3,683         | 0.000 | 386,856   | 0.000            | 238,081   | 0.000            | 285,714 |
| 10      | lipa20b | 20   | 27,076        | 0.000 | 364,584   | 0.000            | 277,407   | 0.000            | 233,970 |
| 11      | lipa30a | 30   | 13,178        | 0.000 | 104,987   | 0.000            | 54,075    | 0.000            | 104,939 |
| 12      | lipa30b | 30   | 151,426       | 0.000 | 102,598   | 0.000            | 56,856    | 0.000            | 61,550  |
| 13      | lipa40a | 40   | 31,538        | 0.907 | 43,018    | 0.000            | 18,082    | 0.907            | 36,566  |
| 14      | lipa40b | 40   | 476,581       | 0.000 | 41,186    | 0.000            | 19,034    | 0.000            | 29,478  |
| 15      | lipa50a | 50   | 62,093        | 0.892 | 42,978    | 0.849            | 15,372    | 0.892            | 37,043  |
| 16      | lipa50b | 50   | 1,210,244     | 0.000 | 41,633    | 0.000            | 16,644    | 0.000            | 30,964  |
| 17      | lipa60a | 60   | 107,218       | 0.844 | 24,248    | 0.787            | 7,166     | 0.844            | 21,339  |
| 18      | lipa60b | 60   | 2,520,135     | 0.000 | 24,046    | 0.000            | 7,938     | 0.000            | 16,725  |
| 19      | lipa70a | 70   | 169,755       | 0.775 | 15,016    | 0.725            | 4,056     | 0.773            | 13,187  |
| 20      | lipa70b | 70   | 4,603,200     | 0.000 | 14,644    | 0.000            | 4,358     | 0.000            | 9,767   |
| 21      | lipa80a | 80   | 253,195       | 0.678 | 10,026    | 0.628            | 2,335     | 0.678            | 8,510   |
| 22      | lipa80b | 80   | 7,763,962     | 0.000 | 9,701     | 0.000            | 2,451     | 0.000            | 6,214   |
| 23      | lipa90a | 90   | 360,630       | 0.636 | 6,836     | 0.581            | 1,412     | 0.636            | 6,231   |
| 24      | tai12b  | 12   | 39,464,925    | 0.000 | 1,619,258 | 0.000            | 1,682,704 | 0.000            | 953,511 |
| 25      | tai20b  | 20   | 122,455,319   | 0.000 | 266,289   | 0.000            | 207,118   | 0.000            | 183,113 |
| 26      | tai25b  | 25   | 344,355,646   | 0.000 | 121,862   | 0.000            | 83,619    | 0.000            | 89,529  |
| 27      | tai30b  | 30   | 637,117,113   | 0.000 | 65,700    | 0.000            | 38,047    | 0.000            | 28,945  |
| 28      | tai35b  | 35   | 283,315,445   | 0.000 | 40,095    | 0.000            | 23,213    | 0.000            | 31,932  |
| 29      | tai40b  | 40   | 637,250,948   | 0.000 | 24,696    | 0.000            | 13,527    | 0.000            | 19,742  |
| 30      | tai50b  | 50   | 458,821,517   | 0.073 | 23,734    | 0.058            | 11,315    | 0.073            | 20,253  |
| 31      | tai60b  | 60   | 608,215,054   | 0.008 | 12,713    | 0.038            | 4,863     | 0.089            | 10,853  |
| 32      | tai80b  | 80   | 818,415,043   | 1.594 | 4,988     | 0.844            | 1,597     | 1.594            | 4,563   |
| 33      | tai100b | 100  | 1,185,996,137 | 0.875 | 2,298     | 0.653            | 563       | 0.762            | 2,116   |
| 34      | tai150b | 150  | 498,896,643   | 1.473 | 624       | 1.467            | 92        | 1.473            | 584     |
